# Supplementary material
Source: publisher figshare collection journal article supplement (https://sage.figshare.com/ndownloader/files/20186355)
Supplement: Supplementary file 1 [file 20186355]

## TREATMENT PREFERENCES

Imagine you had a **moderate/severe stroke** that would not improve. Please indicate whether you would want, or not want, each of the treatments listed below.

|                                              |                                                                                         | Want                                  | Don't Want                            |
|----------------------------------------------|-----------------------------------------------------------------------------------------|---------------------------------------|---------------------------------------|
| 1.                                           | Have kidney dialysis for less than one month                                            | <input type="checkbox"/> <sub>1</sub> | <input type="checkbox"/> <sub>2</sub> |
| 2.                                           | Have kidney dialysis for greater than one month                                         | <input type="checkbox"/> <sub>1</sub> | <input type="checkbox"/> <sub>2</sub> |
| 3.                                           | Have cardiopulmonary resuscitation (CPR)                                                | <input type="checkbox"/> <sub>1</sub> | <input type="checkbox"/> <sub>2</sub> |
| 4.                                           | Be connected to a mechanical ventilator for a brief period of time (less than 24 hours) | <input type="checkbox"/> <sub>1</sub> | <input type="checkbox"/> <sub>2</sub> |
| 5.                                           | Be connected to a mechanical ventilator for up to a month                               | <input type="checkbox"/> <sub>1</sub> | <input type="checkbox"/> <sub>2</sub> |
| 6.                                           | Be connected to a mechanical ventilator for a long period of time (more than one month) | <input type="checkbox"/> <sub>1</sub> | <input type="checkbox"/> <sub>2</sub> |
| 7.                                           | Have a feeding tube for up to one month                                                 | <input type="checkbox"/> <sub>1</sub> | <input type="checkbox"/> <sub>2</sub> |
| 8.                                           | Have a feeding tube for a long period of time (more than one month)                     | <input type="checkbox"/> <sub>1</sub> | <input type="checkbox"/> <sub>2</sub> |
| <b>In this situation, I would also want:</b> |                                                                                         |                                       |                                       |
| 9.                                           | Medicines                                                                               | <input type="checkbox"/> <sub>1</sub> | <input type="checkbox"/> <sub>2</sub> |
| 10.                                          | Surgery                                                                                 | <input type="checkbox"/> <sub>1</sub> | <input type="checkbox"/> <sub>2</sub> |
| 11.                                          | Blood transfusion                                                                       | <input type="checkbox"/> <sub>1</sub> | <input type="checkbox"/> <sub>2</sub> |
